# Supplementary material
Source: PubMed Central journal article supplement (PMC5136581)
Supplement: rspb20161571supp1.pdf [file rspb20161571supp1.pdf]

1 **Supplementary methods for: Sea-level driven glacial-age refugia and post-glacial**  
2 *mixing on subtropical coasts, a palaeohabitat and genetic study*  
3 *Dolby et al.*

4  
5 **Table of Contents**

6 **Genetic methods** **1**

7 Age of genetic patterns  
8 Diversity metrics, mismatch distributions,  $F_{ST}$   
9 Approximate Bayesian Computation  
10 DFA training N. Conception Refugium by proxy  
11 DFA assumptions  
12 Sampling and marker development  
13 PCR protocols and tree reconstruction

14 **Habitat modelling methods** **6**

15 Detailed modelling methodology  
16 *Parameterization*  
17 *Implementation*  
18 *Statistical assessment*  
19 Climatic, oceanographic factors  
20 Coastal process and reworking of sediments  
21 Uplift

22 **Supplementary references** **9**

23  
24  
25 **Genetic methods**

26 Age of genetic patterns

27 Comparison of our microsatellite to mtDNA sequence data indicates that the  
28 microsatellite data are informative for timescales relevant to the glacial-interglacial  
29 processes of interest. North-south mitochondrial clades of *Gillichthys mirabilis* on the  
30 Pacific coast (Figure S2A) diverged at 0.63 Mya (95 % CI 0.24–1.08 Mya) [1,2]. The  
31 same mtDNA markers were used on *Quietula y-cauda* and reveal similar mtDNA  
32 patterns, likely reflecting a similar age of diversification as inferred in *G. mirabilis*.  
33 Microsatellite loci often mutate faster on average and reflect a range of mutation rates [3],  
34 and the microsatellite loci used here exhibit high degrees of polymorphism (average  
35 number of alleles per locus ranged 9.8–18 for individuals sampled across 1000 km).  
36 Given the inferred higher mutation rates of microsatellites, our microsatellite data reflect  
37 a range of evolutionary processes and events younger than the 0.63 Mya mtDNA  
38 divergence age. Thus, a subset of the microsatellite data would correspond to the glacial-  
39 interglacial timescale of interest. We therefore use the Discriminant Function Analysis  
40 (DFA) to obtain a refuge-associated partition of the data to examine LGM-present  
41 processes explicitly and to complement the full microsatellite data analysed in  
42 STRUCTURE.

43  
44 Diversity metrics, mismatch distributions,  $F_{ST}$

45 There are competing expectations regarding patterns of traditional diversity  
46 metrics in refuge-recolonisation scenarios. Refugia are usually centres of high genetic

47 diversity and recolonised sites are bottlenecked and exhibit lower diversity [4]. However,  
48 recolonised sites that are admixed from two genetically distinct source populations (e.g.,  
49 refuges) can instead lead to high diversity measures in those populations [5]. Consistent  
50 with this latter scenario, populations inferred here to be recolonised show similar  
51 measures of allelic richness [6] and gene diversity as refugial source (Vizcaíno and N.  
52 Conception) populations (Figure S5). In mean allelic richness, there is a very slight trend  
53 decreasing toward the north in *F. parvipinnis*, with a similar pattern for mean gene  
54 diversity in *Q. y-cauda*, however the northernmost population, Morro Bay, may also have  
55 been bottlenecked (see DFA training N. Conception Refugium by proxy). In addition,  
56 ranges of these taxa are extensive to the south of the study area (Pta Eugenia), potentially  
57 providing an intermittent source of alleles from the south, which is beyond the scope of  
58 this study.

59 *Gillichthys mirabilis* has sufficiently distinct northern and southern mitochondrial  
60 clades (Figure S2A), and adequate populations and individuals sampled such that  
61 mismatch distributions may reflect the admixed or non-admixed nature of populations  
62 (for example see [7]). Broadly, the mismatch distributions reveal unimodal distributions  
63 for refuge populations, and bimodal or multimodal distributions for several intervening  
64 (inferred as recolonised) populations (Figure S6). This pattern suggests that, for *G.*  
65 *mirabilis*, refuges are stable through time (single modes) and intervening sites experience  
66 contributions from genetically distinct sources (bimodal or multi-modal patterns). The  
67 inferred recolonised populations that show unimodal distributions (DEV, USB, MGU)  
68 are within the Southern California Bight, north of the offshore islands where eddy mixing  
69 may homogenize genetic signatures during the pelagic larvae phase. This is also the  
70 location where STRUCTURE results begin showing notable admixture (Figure 4A).

71 Pairwise  $F_{ST}$  measures using microsatellite data for all three species indicate *G.*  
72 *mirabilis* may be more dispersive than *F. parvipinnis* (Table S4). Sample limitations for  
73 *Q. y-cauda* render inferences difficult due to low statistical power.

74 Overall, factors such as sample size and local founder events confound traditional  
75 population genetic metrics, which is why in this study we relied primarily on STRUCTURE  
76 and a novel DFA approach to evaluate genetic structure. Based on such results, DFA may  
77 be a tool for population-level inference when traditional metrics are problematic due to  
78 mixing of multiple sources, founder effects, and sample sizes.

## 80 Approximate Bayesian Computation (ABC) simulations

81 *ABC Motivation and Parameterization* An expanding wave front during  
82 northern range expansion can enrich northerly populations in different alleles than the  
83 source (southern) refugium, possibly resulting in an appearance of two end-members with  
84 admixture of intervening populations, which we observe (Figure 3). To assess this  
85 possibility, we hypothesis-tested two simplified phylogeographic scenarios using DIYABC  
86 v2.1.0 [8]. Populations for each species were grouped separately into three groups: a  
87 southern refugial group, a middle ‘admixed’ group, and a northern ‘refugial’ group. This  
88 grouping allowed us to simplify demographic assumptions and increase statistical power  
89 to explicitly test whether a two-refugium or one-refugium scenario would be more likely  
90 to produce our observed genetic data. Scenario 1 had two refugia (north and south, as  
91 inferred from our habitat models) with bi-directional recolonization (admixture) of  
92 intervening habitats by the two source refugia. Scenario 2 had a single southern-refugium

93 (Vizcaíno) with stepping stone recolonization of northern sites (Figure S9). Scenario 2  
94 lacks admixture because there is no second genetic source to contribute.

95 We increased the default 40-bp allele range to 50 bp for *G. mirabilis* and 130 bp for  
96 *Q. y-cauda*, and 90 bp for *F. parvipinnis* after excluding two markers with larger ranges.  
97 We ran two million simulations per species assuming constant population sizes. The  
98 admixture in scenario 1 assumes equal source contributions. We assume a 2-year  
99 generation time and conservatively based event ages on our habitat models where  
100 colonization of the ‘admixed’ population occurred ~8 kya and populations merged ~20  
101 kya at the LGM. The assumed merging of populations 20 kya is dictated by *scenario 2* in  
102 which isolation of the refuge coincides with sea-level lowstand ~20 kya. Unless  
103 otherwise noted, we used default parameters.

104

105 *ABC Results* We calculated posterior values under the two scenarios using 2  
106 million simulated datasets and inference from both a direct or logistic approach. Direct  
107 approach used 50–500 closest datasets (sample interval: 50), and the logistic approach  
108 used 4,000–20,000 closest datasets (sample interval: 4000). All posterior values sampled  
109 favored scenario 1, which was the two-refuge scenario (Table S6). Though the range of  
110 predictive posterior errors we present for the three species appears high (0.14–0.23),  
111 these values are within the range documented elsewhere for the Monte Carlo estimation  
112 of predictive posterior error in DIYABC [9]. Moreover, we expect somewhat high error  
113 values given the simplifying assumptions we made about the phylogeographic scenarios  
114 we tested, and a lack of knowledge about effective population size through time, relative  
115 admixture rates, the assumed absence of migration, and unknown generation times for  
116 these species.

117

118 *ABC-testing Isolation By distance* We tested another alternative hypothesis  
119 (data not shown in manuscript) for *Quietula y-cauda* to try to test support for our inferred  
120 two-refugium + admixture scenario against isolation by distance (IBD). We couldn’t  
121 explicitly model IBD in DIYABC, so we assumed that for IBD (and not admixture) to have  
122 produced the genetic patterns we observe would require that the populations persisted  
123 over this timescale *in situ*. So, we allowed the 3 groups to evolve separately without  
124 admixture since 20 kya (10,000 generations), which essentially assumes all populations  
125 sheltered in place during the LGM. The two-refugium model was greatly favored (direct  
126 approach: 0.96; logistic approach: 0.999) over this independent ‘evolved *in situ*’ scenario.  
127 This result suggests that an IBD-only scenario (without extirpation and end-member  
128 refugia) is unlikely to produce this pattern.

129

130

131 DFA training N. Conception Refugium by proxy

132 Modern populations immediately north and south of the North Conception  
133 Refugium (NCR) were used as a training proxy in the DFA discriminant allele analysis.  
134 Morro Bay, immediately north of the NCR, was used for each species, as well as the first  
135 population immediately south of the NCR for each species (Devereaux, Goleta,  
136 Carpinteria populations for *G. mirabilis*, *Q. y-cauda*, and *F. parvipinnis*, respectively).  
137 Since they are immediately adjacent to the NCR (Morro Bay is ~30 km and the farthest  
138 site included to the south is ~100 km), and given the early post glacial formation of

139 habitat in the Santa Barbara Channel (Figure S7), we assume they were founded from the  
140 NCR prior to any southern admixture. Using these proxy populations provided a similar  
141 number of individuals relative to the southern refuge for the discriminant analysis (N:S  
142 training sample sizes were 19:14, 12:8, 26:18 for *G. mirabilis*, *Q. y-cauda*, *F. parvipinnis*,  
143 respectively)

144 This proxy was necessary, because although the NCR identified in our habitat  
145 models is predicted to support tidal estuarine habitat between 140 mbpsl until about 5  
146 mbpsl, at present it does not have tidal habitat or support populations of these three fish  
147 species. Conversion of this habitat likely resulted from natural infilling from wave action  
148 and easily eroded Transverse Ranges [10,11], and anthropogenic processes of leveeing  
149 and damming that promote conversion to a closed lagoon state [12]. Historical maps  
150 indicate that at 1895 the Arroyo Grande/Pismo Creek system in the North Conception  
151 refugium was larger and more open to the ocean than today [13]. Flood control measures  
152 now separate Arroyo Grande and Pismo Creek, precluding tidal behaviour. We therefore  
153 used the two most geographically proximate populations of each species in the genetic  
154 DFA as the N. Conception training group.

155

#### 156 DFA assumptions

157 Discriminant Function Analysis (DFA) assumes that independent variables are  
158 normally distributed. While the nature (0s, 1s, 2s) of allelic count data is likely to violate  
159 this normality assumption, we use DFA to identify alleles discriminating alleles between  
160 the two refuge sites. These alleles are then used in a separate exercise to analyse mixing  
161 along the coastline (Figure 4B). Thus, we are not using DFA as a test statistic to assess  
162 the adequacy of different classification schemes, which makes the violation of normality  
163 less consequential.

164 Discriminant Function Analysis also assumes equal variance among independent  
165 variables (alleles). We found that per-allele variance of total observations ranged in *F.*  
166 *parvipinnis* from 0.01 to 0.25 (mean = 0.082, median = 0.06), for example. Another issue  
167 of concern in this analysis is multicollinearity, in which variables are correlated. In this  
168 study, the multicollinearity of our variables is dependent on, and limited by, basic  
169 biological processes, such a random versus non-random mating and low recombination  
170 rates relative to the microsatellite loci studied, such that linkage disequilibrium may  
171 colinearize otherwise independent alleles. Similarly, the assumption of random sampling  
172 is satisfied to the extent possible given that individuals are components of interbreeding  
173 populations, and in that regard are not truly independent of other individuals. We took  
174 care to sample estuaries thoroughly, and individuals from different locations within  
175 estuaries were mixed, which may reduce batch effects from any individual seine haul.

176

#### 177 Sampling and marker development

178 Individuals were collected via seining and preserved in 100 % ethanol in the field  
179 (permit numbers DGOPA 14253.101005.6950 CASCP No. 2679). DNA extractions were  
180 performed using Qiagen DNeasy Blood and Tissue Kit according to manufacturer's  
181 directions for muscle tissue. Microsatellite loci were developed using sequencing on the  
182 Roche 454 platform of one individual per species and processed with MSATCOMMANDER  
183 [14] to generate primers; tetra-, tri-, and di-nucleotide repeats were favoured, respectively.  
184 Markers were screened using a subsample of individuals across populations and repeat

185 number of some homozygotes were verified by standard PCR and Sanger sequencing  
186 methods using 1 µL of each microsatellite primers (10 mM) in separate reactions.  
187 Microsatellite genotyping plates were run on six to twelve individuals per estuary (where  
188 available) according to Ellingson [1] and genotyped in GENEIOUS v5.6  
189 (<http://www.geneious.com>, [15]). Small sample sizes were recovered from some estuaries  
190 (Table S1). After discarding loci of substandard quality and individuals with significant  
191 missing data (not genotyped for > 2 loci), the number of loci, total number of alleles, and  
192 sample sizes are as follows: *G. mirabilis* (16, 80, 100), *Q. y-cauda* (17, 148, 44), and *F.*  
193 *parvipinnis* (20, 199, 79).

194 Worth noting, the DFA and STRUCTURE analyses are fundamentally different  
195 approaches to analysing genetic data. We analysed the STRUCTURE output from one run  
196 of *F. parvipinnis* ( $K = 2$ ) and identified alleles that had an estimated per cluster allele  
197 frequency greater than 0.7, which yielded 15 alleles. Comparing the identity of 15 alleles  
198 to the identities of discriminant alleles significant through DFA ( $N = 39$ ) yielded a match  
199 of 47 %. In summary, these approaches draw on partially independent components of the  
200 overall genotypic dataset, analyses them through different statistical/probabilistic  
201 methods, and produce very similar results.

#### 202 203 PCR protocols and tree reconstruction

204 Microsatellite PCR reactions used one hybrid primer combination: 2 µl Reverse  
205 primer (100 µM), 4 µl Forward M13 hybrid primer (2.5 µM), 4 µl M13 dye labelled  
206 primer (2.5 µM), 90 µl H<sub>2</sub>O for a total of 100 µl. Thermocycler protocol is: 1) 95 °C 15  
207 minutes, 2) 94 °C 30 sec, 3) 55 °C 1 min 30 sec, 4) 72 °C 1 min, 5) repeat steps 2–4 24x,  
208 6) 94 °C 30 sec, 7) 50 °C 1 min 30 sec, 8) 72 °C 1 min, 9) repeat steps 6–8 24x, 10) 60 °C  
209 30 min, 11) end. PCR products are diluted to 5 % (2 µl PCR product to 38 µl H<sub>2</sub>O) for  
210 genotyping reaction with 10 µl of a 1:50 LIZ: Hi-Di mix (95 °C for 5 minutes).

211 Mitochondrial Control Region (mtCR) and cytochrome B (Cyt B) were amplified  
212 and sequenced for *G. mirabilis* and *Q. y-cauda* using A and M, AJG15 and H5 primer  
213 sets [16,17]. Primers K and N from [17] were used to amplify and sequence mtCR for  
214 *Fundulus parvipinnis*. Amplification and sequencing protocols are available in detail [1].  
215 Trees were constructed in MRBAYES v3.1.2 [18] on the CIPRES Science Gateway [19].  
216 Sequences was partitioned by gene and a rate partitioning scheme was applied to mtCR  
217 region in *Q. y-cauda* following [2] and eliminating the fastest rate column of four due to  
218 concern over homoplasy (Figure S3A). Three runs of 12 million generations were  
219 completed with 4 chains per run under default model settings and a burn-in fraction of  
220 25 % trees discarded. While unresolved in our Bayesian analysis, *F. parvipinnis* structure  
221 was recovered in a Neighbour-Joining tree reconstruction method previously [20] and  
222 showed north-south geographically structured clades.

223 The following programs were used for file conversions: CONVERT, GENODIVE,  
224 and PGDSPIDER [21-23]. Observed mtDNA mismatch distributions and pairwise  $F_{ST}$  were  
225 calculated in Arlequin v3 [24]; gene diversity and allelic richness were calculated in  
226 FSTAT v1.2 [25]. STRUCTURE v2.3 [26] was used to run  $K = 2-5$  (3 replicates each) that  
227 were analysed in STRUCTURE HARVESTER [27]. The following graphics R packages were  
228 used: LATTICE, ADE4, PLYR, RESHAPE2, GGLOT2 [28-31]. All other statics were  
229 performed in JMP® v11 (SAS Institute Inc., Cary, NC, 1989-2007).

230

231 **Habitat modelling methods**

232

233 Detailed modelling methodology

234 *Parameterization* To predict estuarine habitat area, we defined two criteria necessary  
235 to form estuarine habitat. First, we used GOOGLE EARTH to calculate modern bathymetric  
236 slopes amongst the 18 estuaries in this study (Table S3). For five relatively large and  
237 heterogeneous estuaries, we captured a range of within-estuary slopes at the centre, sides,  
238 stream entry, mouth, as applicable. We calculated a single slope from each of 13  
239 relatively small estuaries. The ‘run’ used for slope calculations varied with estuary size  
240 from 200–5,000 m. Slopes ranged between 0 % and 1.3 % (mean = 0.45, median = 0.39).  
241 Our second criterion was a sea-level requirement. Using a composite sea-level curve [32],  
242 sea-level lowstand was determined as 130–140 mbpsl. The midpoint depth value was  
243 used to date each bin (e.g., 135 mbpsl).

244

245 *Implementation* Using the raster calculator tool in ARCMAP v10 (ESRI, Redlands,  
246 CA), we queried an SRTM30\_PLUS [33] Digital Elevation Model (DEM)  
247 (WGS\_1984\_UTM\_Zone\_11N) for areas matching the slope analysis range (0.0–1.3 %) and  
248 10-metre depth range (e.g., 130 – 140 mbpsl). We iterated this process for 0–140  
249 mbpsl to yield a sequence of depth-specific layers using the following equation (Eq 1):

250

251 *Eq 1* ("Elevation" < x) & ("Elevation" ≥ y) & ("Slope" ≤ 1.3)

252 *Example* ("Elevation" < -130) & ("Elevation" ≥ -140) & ("Slope" ≤ 1.3)

253

254 where x is the upper and y is the lower limit of each depth bin, respectively. For the  
255 present (0 kya) bin we used  $0 \pm 5$  mbpsl. We converted areas matching our query (value  
256 = 1) to a sequence of feature layers in which simplified polygons bounded areas that met  
257 habitat requirements. To obtain per-depth area estimates for individual coastal regions we  
258 also created a feature layer for each coastal location. With the “*Select Features by*  
259 *Location*” tool, we selected the habitat area polygons within each coastal region using the  
260 ‘*Target layer(s) features are within (Clementini) the source layer*’ setting. On these  
261 selected features we used the “Statistics” feature to provide the following statistical  
262 attributes: number of polygons, minimum polygon area, maximum polygon area, total  
263 polygon area, mean polygon area, and standard deviation of polygon area. We added an  
264 additional attribute, which normalised the summed polygon area by the coastal feature  
265 area to account for different coastal area sizes (analogous to habitat density within a  
266 given coastal area). These statistical attributes were calculated per depth bin within each  
267 coastal region: 14 depth bins, 9 coastal regions, 7 statistical attributes per bin-region  
268 produced 882 observations. Of note, the Mercator projection used here could bias  
269 polygon areas by a maximum of 7 % of width over the latitude range studied (larger in  
270 the northern regions and smaller in the south) relative to an equal area projection. As it is  
271 however, the northern polygon areas are already smaller than southern polygons (i.e.  
272 Vizcaíno), and would be unlikely to alter interpretations herein.

273

274 *Statistical assessment* To better determine whether the three fish species studied  
275 here would likely inhabit the lowstand-associated polygon habitat, we used the modern (0  
276 kya,  $0 \pm 5$  mbpsl) depth bin and species occurrences from this study to determine which

277 polygon statistical attribute(s) predict species occurrences. We performed Discriminant  
278 Function Analysis (DFA) using JMP on the seven statistical attributes of 8 coastal  
279 locations grouped by habitat presence (N = 6) or absence (N = 2). Vizcaíno was excluded  
280 from the DFA analysis after a Robust Fit Outliers analysis (using Huber and Quartile  
281 methods with the default K = 4) revealed anomalous coastal area size, which biased the  
282 statistical attributes. A stepwise variable selection process (SSP) in the DFA produced  
283 two statistically significant predictive variables: Maximum polygon area (maximum size  
284 of a single polygon) and total habitat area. We then entered these variables into a  
285 Generalized Linear Model (GLM) with binomial distribution (variable states were ‘yes’  
286 or ‘no’) to determine which coastal region(s) were likely to have supported refuge  
287 populations within the 130–140 m (~20 kya) depth bin. If the GLM was significant, it  
288 was re-run using Firth’s Biased Adjustment estimates and False Discovery Rate. We  
289 performed this iteratively for different refuge scenarios. Unlike typical GLM analyses,  
290 this was not used to exclude variables from the refuge scenario model, but rather test  
291 whether the refuge scenario was statistically significant using the two variables identified  
292 *a priori* to be predictive. Key refuge scenarios are listed in Table S6 with significance  
293 scores. Only one refuge scenario was statistically significant (Vizcaíno + North  
294 Conception). Vizcaíno was run as a refuge model individually with each additional  
295 population not listed in Table S6, none of which were significant in the GLM.

296

#### 297 Climatic, oceanographic factors

298 For the tidal estuarine habitat of focus here, we modelled the major physical  
299 geomorphological parameters required for estuary formation. In traditional Ecological  
300 Niche Modelling geomorphology is considered constant and temperature and  
301 precipitation indices are usually the foremost predictors of palaeohabitat distributions for  
302 both terrestrial and intertidal species [34,35]. However, we argue that temperature and  
303 precipitation are less important for estuarine habitat than the fundamental geomorphic  
304 processes that physically form the estuaries in the first place. The application of  
305 geomorphic primacy in this study is further supported by the relatively small change in  
306 temperature from the LGM to present, because tidal systems generally have a range of  
307 salinities within the system due to marine and freshwater (river) inputs, and because  
308 spring and summer estuary temperatures are often controlled by cloud cover which is in  
309 turn controlled by upwelling. Upwelling driven factors are partially independent of other  
310 glacial and typical seasonal temperature controls. The physical shape, size, and ecology  
311 of tidal estuaries can also greatly affect temperature, but are rarely well studied in modern  
312 systems. Such detailed reconstructions would be very difficult for palaeoestuaries  
313 because palaeorecords are difficult to recover (via coring or seismic imaging) and  
314 estuaries migrate over time. Thus, local non-geomorphic variables are difficult to assess,  
315 and regional temperature patterns are probably secondary and difficult to recover on a  
316 biologically meaningful temporal or spatial scale.

317 Finally, there are additional oceanographic features that we did not take into  
318 account [36]. Specifically, Point Conception marks the northern extent of eddy formation  
319 in the southern California Bight (Pt. Conception to Dana Point) [37,38]. The resulting  
320 increased retention and mixing of water in this region may have an impact on larval  
321 dispersal through a homogenizing effect in southern California specifically [39]. This  
322 homogenization may help explain why the north-south cline observed in Figure 4A

323 begins near the southern end of eddy mixing, and the northern (Morro Bay-Mugu)  
324 populations of all three taxa appear mixed on this scale.

325

### 326 Coastal process and reworking of sediments

327 As is captured in our analysis there is loss of estuary habitat potential through the  
328 Holocene. This is a product of coastal process and sediment transport that reshapes the  
329 coast and fills estuaries with sediment in the absence of rising sea-levels that form  
330 accommodation space and create estuaries, as was the case from 20–10kya. Coastlines  
331 retreated in the Holocene due to wave action in some regions [10,40], while riverine  
332 embayments filled with sediment from long-shore transport and down-stream sediment  
333 supply (Jacobs et al. 2011). Even within the Holocene these processes vary across time,  
334 with coastal orientation, and with regional lithology [10,41]. Lithology is important  
335 because easily eroded formations will supply more sediment to be reworked. We  
336 acknowledge that these factors would have influenced the coastal and underwater  
337 topography over the timescale of this study. However, these effects are difficult to  
338 parameterize, and we therefore used modern topo-bathymetric data to approximate this  
339 aspect of our models.

340 More formal coastal process/coastal evolution models could inform about details  
341 of the nature and quantity of estuarine habitat through time. More detailed process  
342 models could include changing wave attack with sea-level, and climatic influence on  
343 coastal and stream-flood transported sediment through time. However, there would be  
344 considerable complexity in applying such a detailed formal coastal process model that  
345 covered estuary formation, and there are also data limitations that preclude simple  
346 parameterisation of such a model if it were to be comprehensive over the last 20 kyrs. It  
347 is difficult to assess the accuracy of these short-term processes. Such model development  
348 and refinements are desirable, but are of a second order and well beyond the scope of the  
349 first order work presented here.

350

### 351 Uplift

352 Significant coastal uplift could, in theory, affect the depth-time correlations  
353 inferred from the sea-level curve. However, uplift rates along the coast are typically less  
354 than a millimetre per year and unlikely to influence the results of this work when  
355 extrapolated over the LGM to present (20 kyrs). As a sensitivity test, we used a 0.7  
356 mm/yr uplift rate extrapolated over 20 kyr, which still produced qualitatively and  
357 quantitatively similar results, including the existence of the Conception and Vizcaíno  
358 Refugia. Estuaries along this coast are typically on the downthrown block in locally  
359 tectonically active areas and are therefore experiencing minimal or no uplift. For example,  
360 Pts. Buchon, Loma, and Banda are on uplifting blocks with rates of 0.24–0.09, 0.14–0.16,  
361 0.22–0.25 mm/yr, providing upper limits on uplift rates for the adjacent estuaries of  
362 Morro Bay, San Diego Bay, and Banda, respectively [42,43]. At these rates the effects of  
363 uplift on our habitat modelling are negligible.

364 Exceptions to low uplift rates (i.e. 2 mm/yr) are observed locally in the Santa  
365 Barbara Channel and could affect our results by biasing the habitat origination ages in  
366 this region towards younger estimates [44,45]. Given higher uplift rates in this region we  
367 cannot exclude the possibility of habitat in this region at lowstand 20 kya. Such habitat



368 could then be viewed as an extension of the adjacent North Conception Refugium, and  
369 would not greatly alter our biological interpretations.

370

### 371 **Supplementary references**

- 372 1. Ellingson, R. 2012 Phylogenetics and phylogeography of North Pacific bay gobies:  
373 adaptive convergence, relictual endemism, and climate-driven population structure.  
374 1–107.
  
- 375 2. Ellingson, R. A., Swift, C. C., Findley, L. T. & Jacobs, D. K. 2014 Convergent  
376 evolution of ecomorphological adaptations in geographically isolated Bay gobies  
377 (Teleostei: Gobionellidae) of the temperate North Pacific. *Mol. Phylogenet. and*  
378 *Evol.* **70**, 464–477. (doi:10.1016/j.ympev.2013.10.009)
  
- 379 3. Wan, Q.-H., Wu, H., Fujihara, T. & Fang, S.-G. 2004 Which genetic marker for  
380 which conservation genetics issue? *Electrophoresis* **25**, 2165–2176.  
381 (doi:10.1002/elps.200305922)
  
- 382 4. Hewitt, G. 2000 The genetic legacy of the Quaternary ice ages. *Nature* **405**, 907–  
383 913. (doi:10.1038/35016000)
  
- 384 5. Petit, R. J. et al. 2003 Glacial refugia: hotspots but not melting pots of genetic  
385 diversity. *Science* **300**, 1563–1565. (doi:10.1126/science.1083264)
  
- 386 6. Nei, M. 1973 Analysis of gene diversity in subdivided populations. *Proceedings of*  
387 *the National Academy of Sciences* **70**, 3321–3323.
  
- 388 7. Dawson, M. N., Louie, K. D., Barlow, M., Jacobs, D. K. & Swift, C. C. 2002  
389 Comparative phylogeography of sympatric sister species, *Clevelandia ios* and  
390 *Eucyclogobius newberryi* (Teleostei, Gobiidae), across the California Transition  
391 Zone. *Mol Ecol* **11**, 1065–1075.
  
- 392 8. Cornuet, J.-M., Pudlo, P., Veyssier, J., Dehne-Garcia, A., Gautier, M., Leblois, R.,  
393 Marin, J.-M. & Estoup, A. 2014 DIYABC v2.0: a software to make approximate  
394 Bayesian computation inferences about population history using single nucleotide  
395 polymorphism, DNA sequence and microsatellite data. *Bioinformatics* **30**, 1187–  
396 1189. (doi:10.1093/bioinformatics/btt763)
  
- 397 9. Robert, C. P., Cornuet, J.-M., Marin, J.-M. & Pillai, N. S. 2011 Lack of confidence  
398 in approximate Bayesian computation model choice. *Proc. Natl. Acad. Sci. U.S.A.*  
399 **108**, 15112–15117. (doi:10.1073/pnas.1102900108)
  
- 400 10. Masters, P. M. 2006 Holocene sand beaches of southern California: ENSO forcing  
401 and coastal processes on millennial scales. *Palaeogeogr. Palaeoclimatol.*  
402 *Palaeoecol.* **232**, 73–95. (doi:10.1016/j.palaeo.2005.08.010)
  
- 403 11. Upson, J. E. 1949 Late Pleistocene and Recent changes of sea level along the coast  
404 of Santa Barbara County, California. *Am. J. Sci.* **247**, 94–115.  
405 (doi:10.2475/ajs.247.2.94)

- 406 12. Jacobs, D., Stein, E. D. & Longcore, T. 2011 Classification of California estuaries  
407 based on natural closure patterns: Templates for restoration and management.  
408 *Southern California Coastal Water Research Project* **619**, 1–50.  
409 (doi:10.2307/3768203)
- 410 13. Gannet, H., Goode, R. U. & Fletcher, L. C. 1895 California. Arroyo Grande  
411 quadrangle (15'), 1987 (1925). *U.S.C. G. Survey*. 35.00000,–120.50000;  
412 35.25000,–120.50000; 35.25000,–120.75000; 35.00000,–120.75000; 35.00000,–  
413 120.50000.
- 414 14. Faircloth, B. C. 2008 msatcommander: detection of microsatellite repeat arrays  
415 and automated, locus-specific primer design. *Molecular Ecology Resources* **8**, 92–  
416 94. (doi:10.1111/j.1471-8286.2007.01884.x)
- 417 15. Kearse, M. et al. 2012 Geneious Basic: an integrated and extendable desktop  
418 software platform for the organization and analysis of sequence data.  
419 *Bioinformatics* **28**, 1647–1649. (doi:10.1093/bioinformatics/bts199)
- 420 16. Akihito et al. 2000 Evolutionary aspects of gobioid fishes based upon a  
421 phylogenetic analysis of mitochondrial cytochrome B genes. *Gene* **259**, 5–15.
- 422 17. Lee, W. J., Conroy, J., Howell, W. H. & Kocher, T. D. 1995 Structure and  
423 evolution of Teleost mitochondrial control regions. *J Mol Evol* **41**, 54–66.
- 424 18. Ronquist, F. & Huelsenbeck, J. P. 2003 MrBayes 3: Bayesian phylogenetic  
425 inference under mixed models. *Bioinformatics* **19**, 1572–1574.  
426 (doi:10.1093/bioinformatics/btg180)
- 427 19. Miller, M. A., Pfeiffer, W. & Schwartz, T. 2010 Creating the CIPRES Science  
428 Gateway for inference of large phylogenetic trees. *2010 Gateway Computing*  
429 *Environments Workshop (GCE)*, 1–8. (doi:10.1109/GCE.2010.5676129)
- 430 20. Bernardi, G. & Talley, D. 2000 Genetic evidence for limited dispersal in the  
431 coastal California killifish, *Fundulus parvipinnis*. *Journal of Experimental Marine*  
432 *Biology and Ecology* **255**, 187–199.
- 433 21. Glaubitz, J. C. 2004 convert: A user-friendly program to reformat diploid  
434 genotypic data for commonly used population genetic software packages. *Mol*  
435 *Ecol Notes* **4**, 309–310. (doi:10.1111/j.1471-8286.2004.00597.x)
- 436 22. Meirmans, P. G. & Van Tienderen, P. H. 2004 GENOTYPE and GENODIVE: two  
437 programs for the analysis of genetic diversity of asexual organisms. *Mol Ecol*  
438 *Notes* **4**, 792–794. (doi:10.1111/j.1471-8286.2004.00770.x)
- 439 23. Lischer, H. E. L. & Excoffier, L. 2012 PGDSpider: an automated data conversion  
440 tool for connecting population genetics and genomics programs. *Bioinformatics* **28**,  
441 298–299. (doi:10.1093/bioinformatics/btr642)

- 442 24. Excoffier, L., Laval, G. & Schneider, S. 2005 Arlequin (version 3.0): an integrated  
443 software package for population genetics data analysis. *Evol. Bioinform. Online* **1**,  
444 47–50.
- 445 25. Goudet, J. 1995 FSTAT (version 1.2): a computer program to calculate F-statistics.  
446 *The Journal of Heredity* **86**, 485–486.
- 447 26. Pritchard, J. K., Stephens, M. & Donnelly, P. 2000 Inference of population  
448 structure using multilocus genotype data. *Genetics* **155**, 945–959.
- 449 27. Earl, D. A. & vonHoldt, B. M. 2011 STRUCTURE HARVESTER: a website and  
450 program for visualizing STRUCTURE output and implementing the Evanno  
451 method. *Conservation Genet Resour* **4**, 359–361. (doi:10.1007/s12686-011-9548-  
452 7)
- 453 28. Wickham, H. 2007 Reshaping data with the reshape package. *Journal of Statistical*  
454 *Software* **21**, 1–20.
- 455 29. Wickham, H. 2011 The split-apply-combine strategy for data analysis. *Journal of*  
456 *Statistical Software* **40**, 1–29.
- 457 30. Sarkar, D. 2008 *Lattice: multivariate data visualization with R*. Springer Science  
458 & Business Media.
- 459 31. Chessel, D., Dufour, A. B. & Thioulouse, J. 2004 The ade4 package-I-One-table  
460 methods. *R news* **4**, 5–10.
- 461 32. Chaytor, J. D., Goldfinger, C., Meiner, M. A., Huftile, G. J., Romsos, C. G. &  
462 Legg, M. R. 2008 Measuring vertical tectonic motion at the intersection of the  
463 Santa Cruz-Catalina Ridge and Northern Channel Islands platform, California  
464 Continental Borderland, using submerged paleoshorelines. *Geol Soc America Bull*  
465 **120**, 1053–1071. (doi:10.1130/B26316.1)
- 466 33. Becker, J. J. et al. 2009 Global bathymetry and elevation data at 30 arc seconds  
467 resolution: SRTM30\_plus. *Marine Geodesy* **32**, 355–371.  
468 (doi:10.1080/01490410903297766)
- 469 34. Waltari, E. & Hickerson, M. J. 2013 Late Pleistocene species distribution  
470 modelling of North Atlantic intertidal invertebrates. *J. Biogeogr.* **40**, 249–260.  
471 (doi:10.1111/j.1365-2699.2012.02782.x)
- 472 35. Syphard, A. D. & Franklin, J. 2009 Differences in spatial predictions among  
473 species distribution modeling methods vary with species traits and environmental  
474 predictors. *Ecography* **32**, 907–918. (doi:10.1111/j.1600-0587.2009.05883.x)
- 475 36. Wares, J. P., Gaines, S. D. & Cunningham, C. W. 2001 A comparative study of  
476 asymmetric migration events across a marine biogeographic boundary. *Evolution*  
477 **55**, 295–306.

- 478 37. Bernstein, R. L., Breaker, L. & Whritner, R. 1977 California Current Eddy  
479 Formation: Ship, Air, and Satellite Results. *Science* **195**, 353–359.  
480 (doi:10.1126/science.195.4276.353)
- 481 38. Seapy, R. R. & Littler, M. M. 1980 Biogeography of rocky intertidal  
482 macroinvertebrates of the Southern California Islands. In *The California islands*  
483 (ed D. M. Powers), pp. 307–323.
- 484 39. Bucklin, A. 1991 Population genetic responses of the planktonic copepod *Metridia*  
485 *pacifica* to a coastal eddy in the California Current. *J. Geophys. Res.* **96**, 14977–  
486 14808.
- 487 40. Masters, P. M. 2003 Archaeological proxies for sediment flux to Holocene littoral  
488 cells of southern California. *OCEANS 2003 Proceedings*  
489 (doi:10.2307/1544815?ref=no-x-route:a90c68308cf77ba0c24096bfc1852714)
- 490 41. Hogarth, L. J., Babcock, J., Driscoll, N. W., Dantec, N. L., Haas, J. K., Inman, D.  
491 L. & Masters, P. M. 2007 Long-term tectonic control on Holocene shelf  
492 sedimentation offshore La Jolla, California. *Geol* **35**, 275–5.  
493 (doi:10.1130/G23234A.1)
- 494 42. Muhs, D. R., Rockwell, T. K. & Kennedy, G. L. 1992 Late Quaternary uplift rates  
495 of marine terraces on the Pacific coast of North America, southern Oregon to Baja  
496 California Sur. *Quaternary International* **15-16**, 121–133. (doi:10.1016/1040-  
497 6182(92)90041-Y)
- 498 43. Lettis, W. R. & Hanson, K. L. 1992 Quaternary tectonic influences on coastal  
499 morphology, south-central California. *Quaternary International* **15/16**, 135–148.
- 500 44. Gurrola, L. D., Keller, E. A. & Chen, J. H. 2014 Tectonic geomorphology of  
501 marine terraces: Santa Barbara fold belt, California. *Geol Soc America Bull* **126**,  
502 219–233. (doi:10.1130/B30211.1)
- 503 45. Niemi, N. A., Oskin, M. & Rockwell, T. K. 2008 Southern California Earthquake  
504 Center Geologic Vertical Motion Database. *Geochem.-Geophys.-Geosyst.* **9**, 1–14.  
505 (doi:10.1029/2008GC002017)
- 506
- 507

1 **Supplementary tables and figures for: Sea-level driven glacial-age refugia and post-glacial**  
 2 **mixing on subtropical coasts, a palaeohabitat and genetic study**  
 3 **Dolby et al.**

4  
5  
6

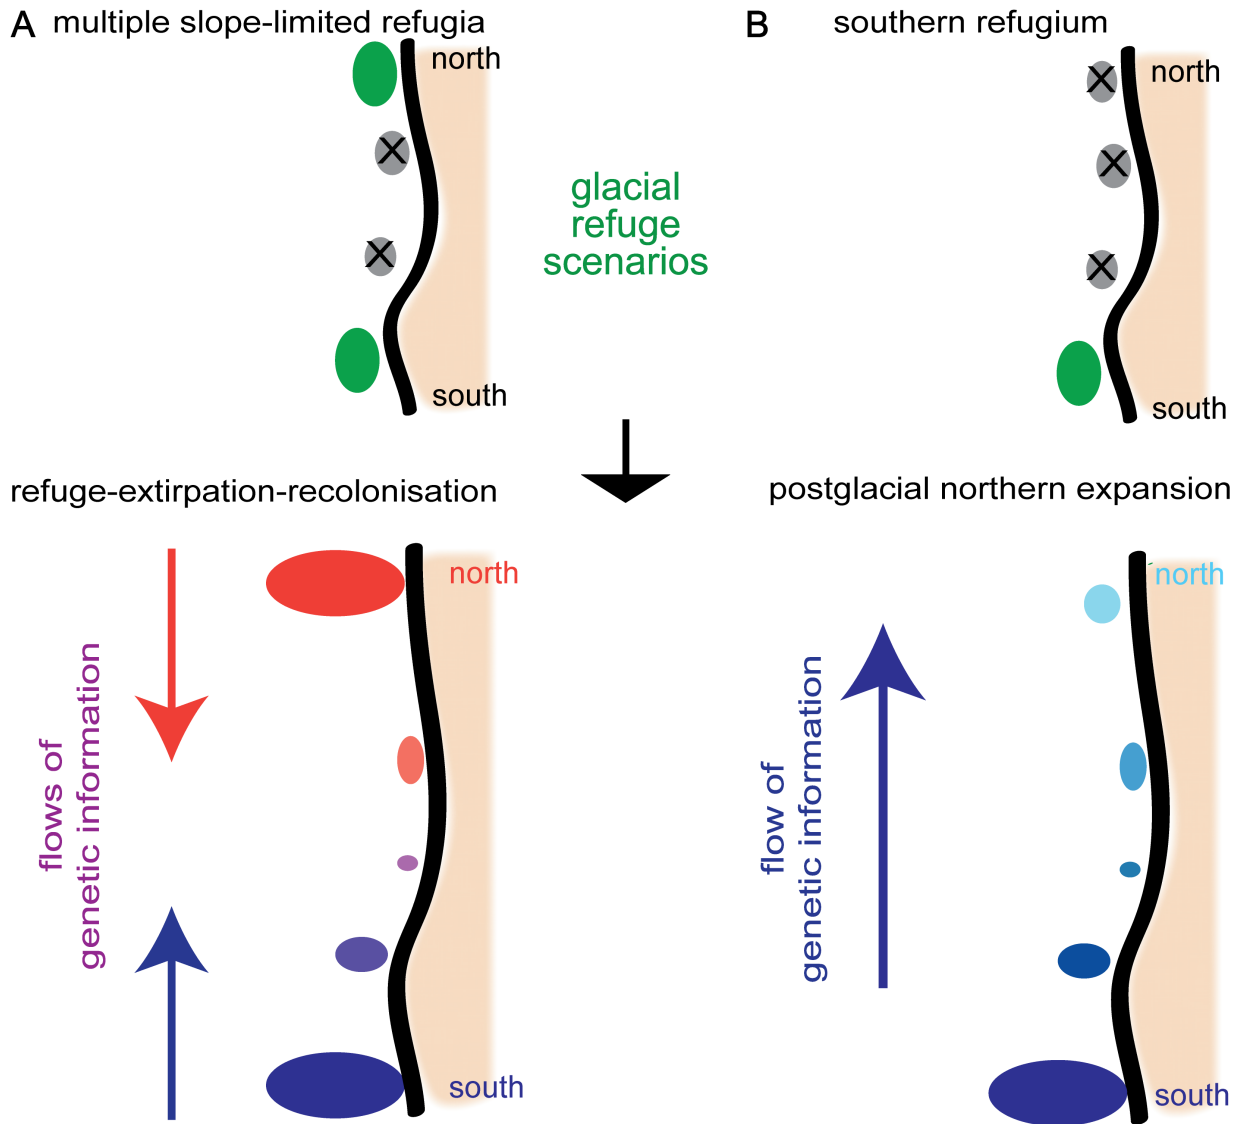

7

8 **Figure S1. Conceptual schematic.** Presented are two refuge-recolonisation scenarios. Colours represent  
 9 genetic relatedness, where more similar colours are more genetically similar. A) Illustration of our  
 10 hypothesis where several estuarine populations reduce to two (upper panel), which diverge (different  
 11 colours, lower panel), and admix (blending of red and blue to form purple) as they bi-directionally  
 12 recolonize. B) This is the conventional model where individuals follow isotherms. Here, southern  
 13 refuge(s) (upper panel) retain all the genetic diversity of the range (blue), and isolation by distance  
 14 northern range expansion (lower panel) renders populations a series of genetic subsampling (blue  
 15 gradient) from the south as individuals post-glacially move northward.

16

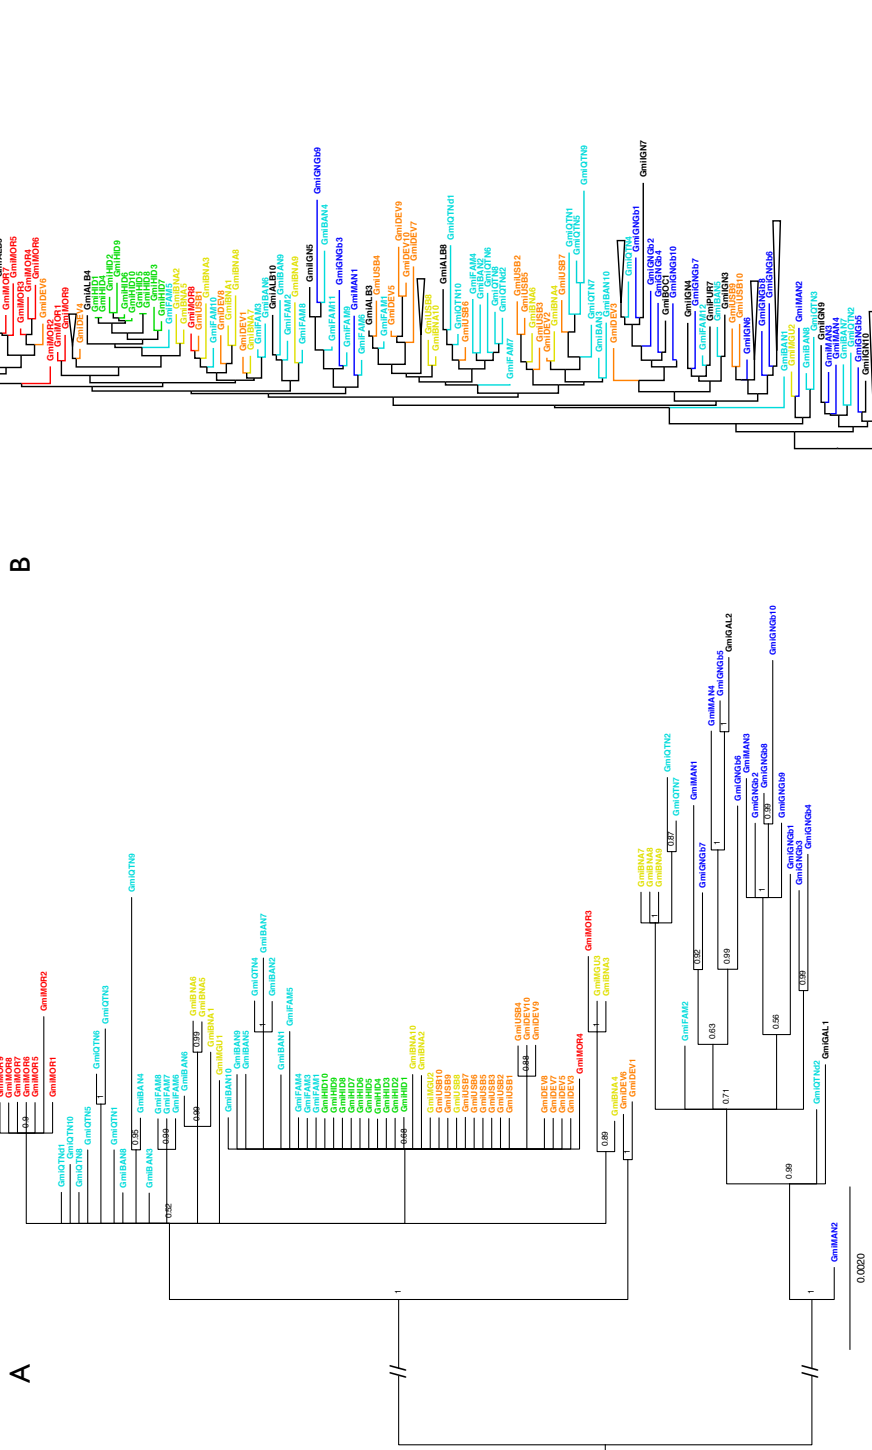

59

40 **Figure S2. New tree reconstructions for *Gillichthys mirabilis*.** A) Construction in MRBAYES using  
 41 mtDNA (mitochondrial control region and Cyt B, 1,831 bp). Node posterior support is shown. B)  
 42 Neighbour-joining tree made in POPULATIONS with the 16 microsatellite loci used in this study. Collapsed  
 43 branches are samples outside the geographic region of the study. Parallel bars indicate shortened branch  
 44 lengths for viewing. Individuals are colour-coded by geographic region, consistent with the scale in Table  
 45 S1, with a red (north) to blue (south) gradient.

46  
47  
48  
49  
50  
51  
52  
53  
54  
55  
56  
57  
58  
59  
60  
61  
62  
63  
64  
65  
66  
67  
68

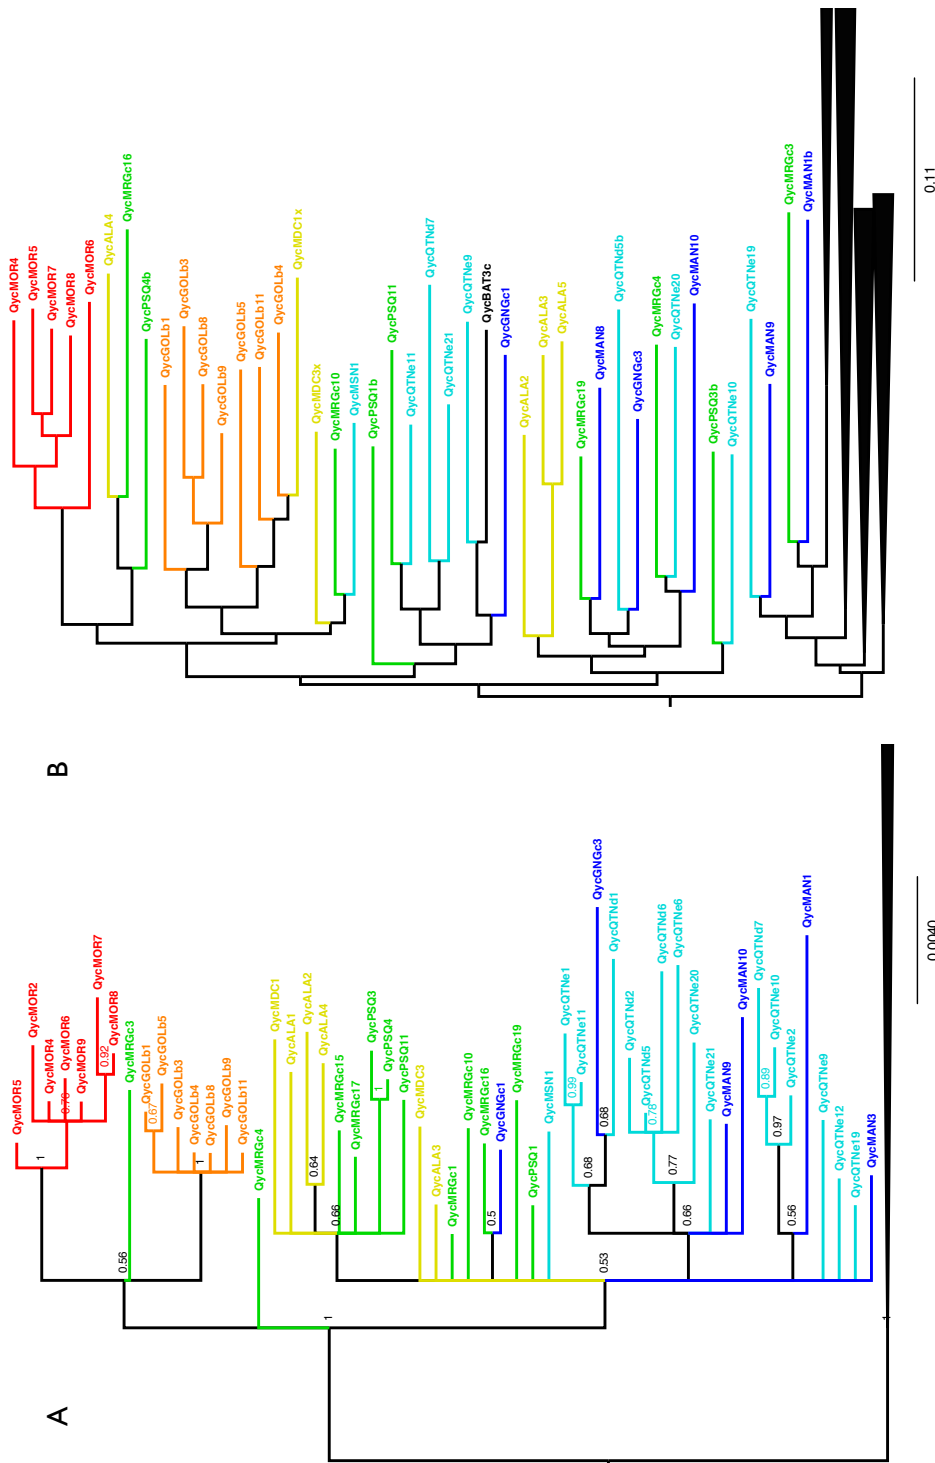

69 **Figure S3. New tree reconstructions for *Quietula y-cauda*.** A) Bayesian tree reconstructed in  
70 MRBAYES using mtDNA (mitochondrial control region and Cyt B, 1,668 bp). Node posterior support is  
71 shown. B) Neighbour-joining tree made in POPULATIONS with the 17 microsatellite loci used in study.  
72 Collapsed branches are samples outside the geographic region of the study. Parallel bars indicate  
73 shortened branch lengths for viewing. Individuals are colour-coded by geographic region, consistent with  
74 the scale in Table S1, with a red (north) to blue (south) gradient.

75  
76  
77  
78  
79  
80  
81  
82  
83  
84  
85  
86  
87  
88  
89  
90  
91  
92  
93  
94  
95  
96  
97  
98  
99  
100  
101  
102  
103

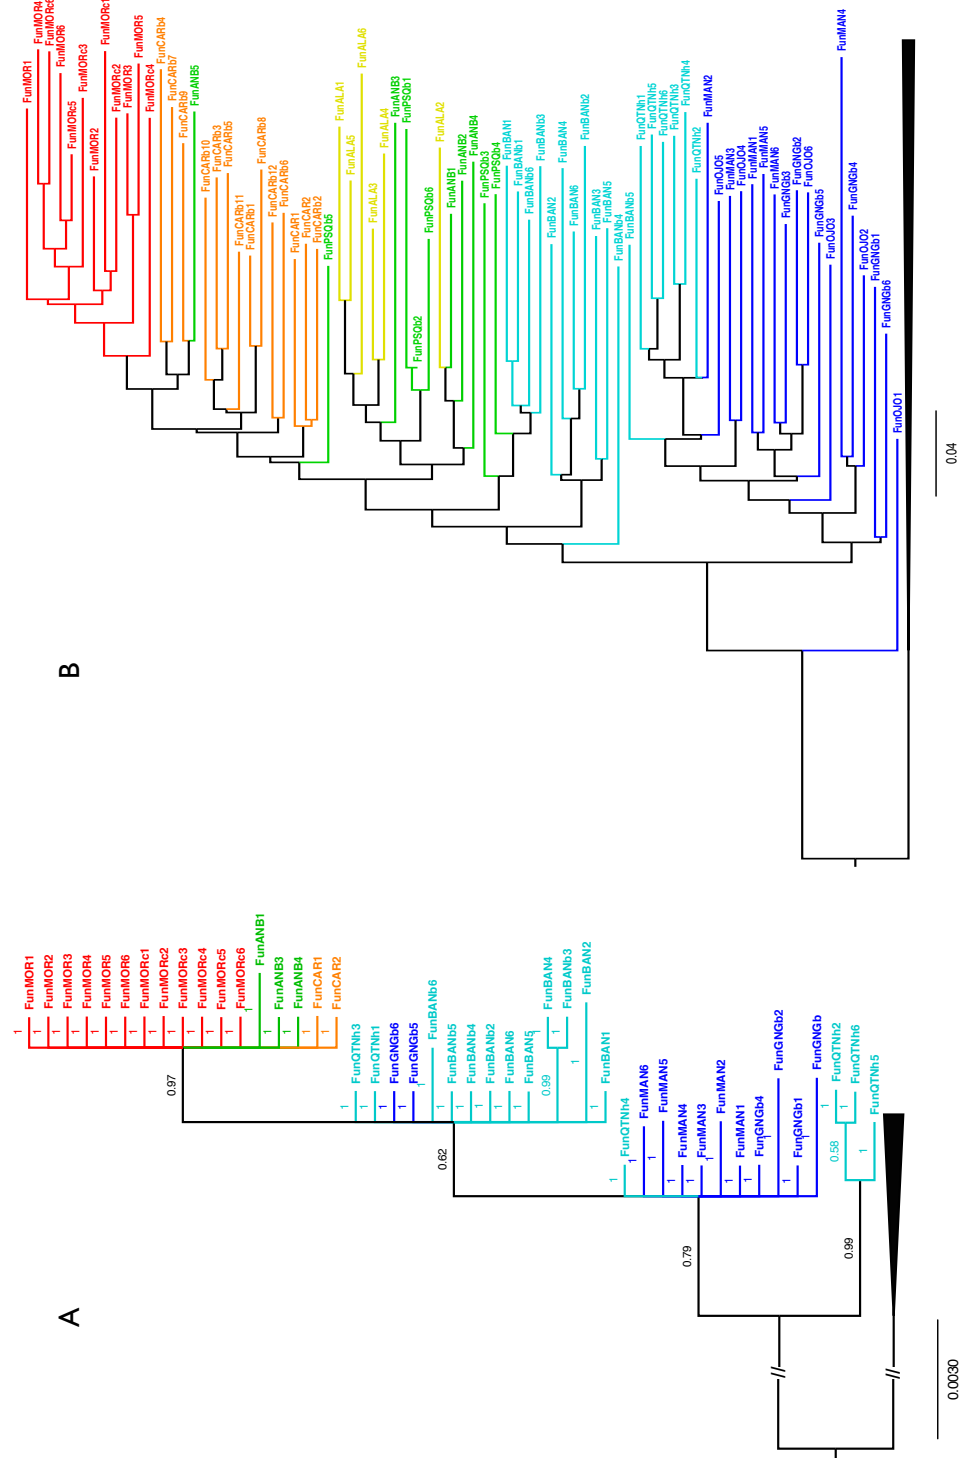

**Figure S4. New tree reconstructions for *Fundulus parvipinnis*.** A) Bayesian tree reconstructed in MRBAYES using mtDNA (mitochondrial control region, 883 bp). Branch posterior support is shown. B) Neighbour-joining tree made in POPULATIONS with the 20 microsatellite loci used in study. Collapsed branches are samples outside the geographic region of the study. Parallel bars indicate shortened branch lengths for viewing. Individuals are colour-coded by geographic region, consistent with the scale in Table S1, with a red (north) to blue (south) gradient.



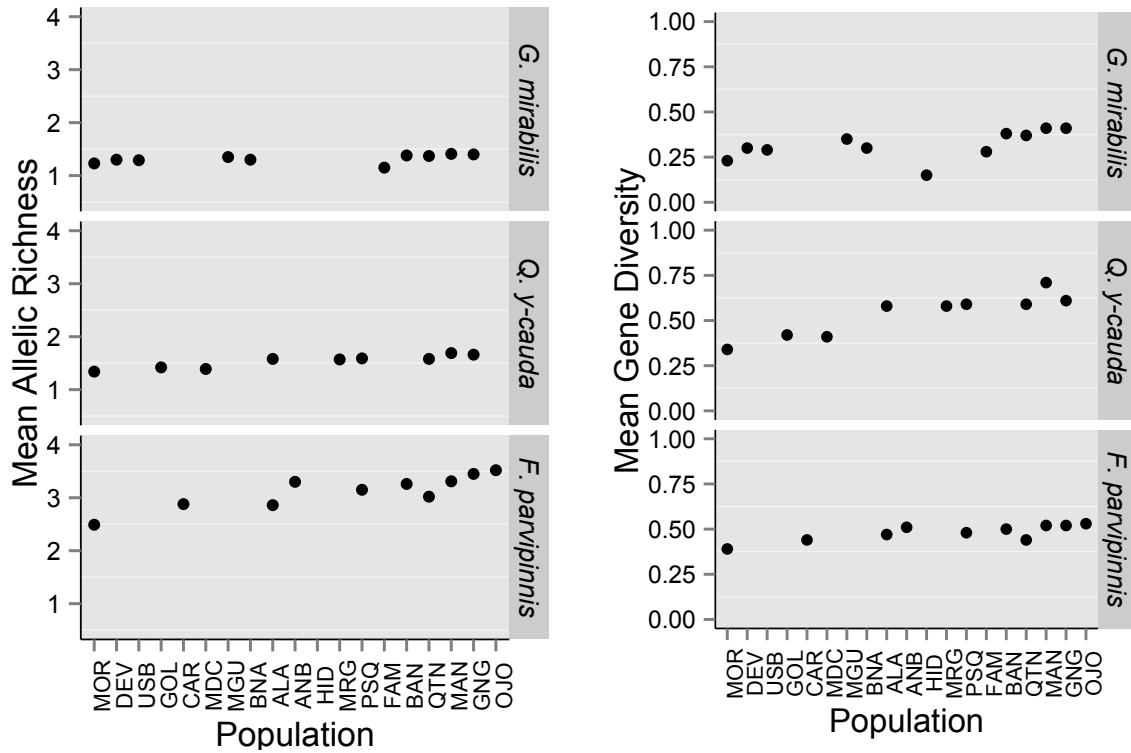

104

105 **Figure S5. Diversity indices.** Mean allelic richness (A) and mean gene diversity (B) for species (listed at  
 106 right, top to bottom); populations oriented north (left) to south (right) on the x-axis. Sites thought to be  
 107 admixed are not higher nor lower in diversity than refuge source populations (MOR, MAN, GNG, OJO).  
 108 Note that the x-axis is not absolute geographic distance because population sites are not equidistantly  
 109 spaced along the coast.

110

111

112

113

114

115

116

117

118

119

120

121

122

123

124

125

126

127

128

129

130  
 131  
 132  
 133  
 134  
 135  
 136  
 137  
 138  
 139  
 140  
 141  
 142  
 143  
 144  
 145  
 146  
 147  
 148  
 149  
 150  
 151  
 152  
 153  
 154  
 155  
 156  
 157  
 158  
 159  
 160  
 161  
 162  
 163  
 164  
 165  
 166  
 167  
 168  
 169  
 170  
 171  
 172  
 173  
 174  
 175  
 176  
 177  
 178  
 179  
 180

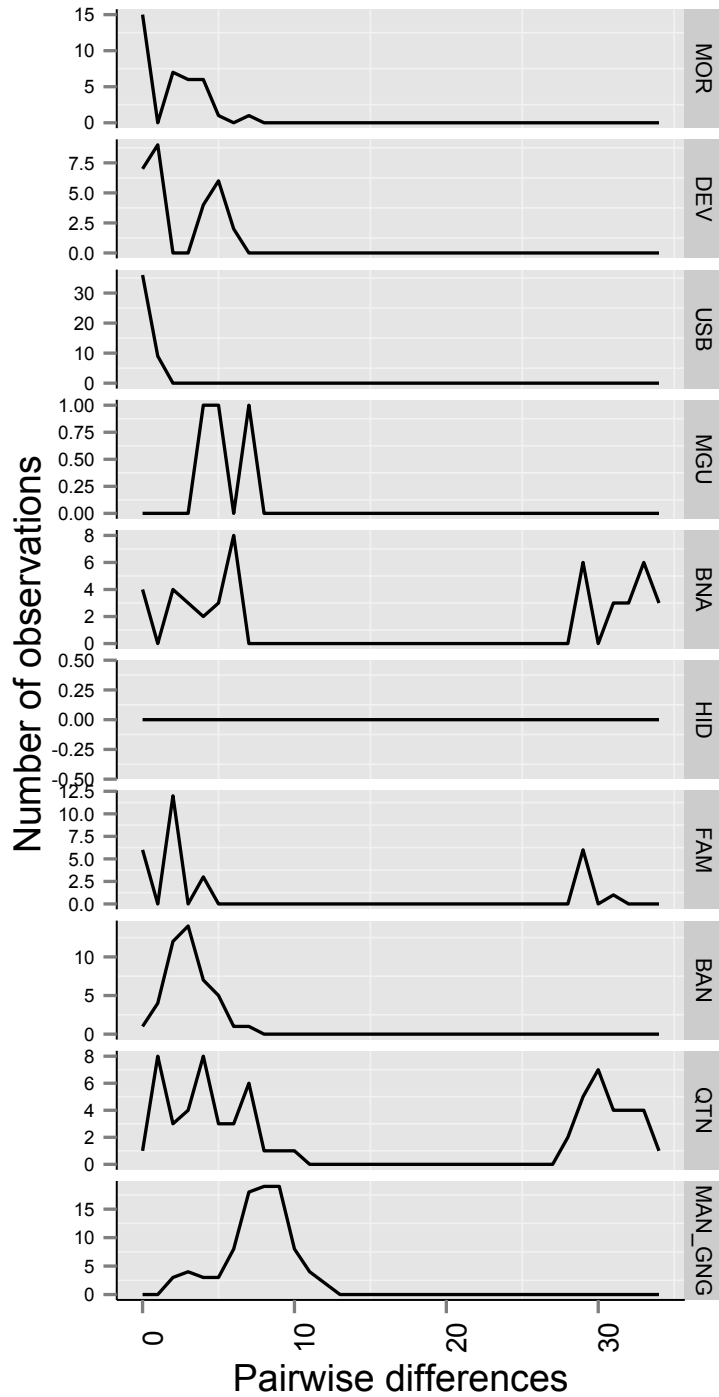

**Figure S6. Mismatch distribution.** Pairwise differences per population for observed haplotypes in *Gillichthys mirabilis*. Sites ordered north to south. Bi- and multi-modal distributions are observed in sites inferred to be admixed, and unimodal distributions are observed in expected refuges (MOR, MAN\_GNG). One site (HID) is monotypic and likely a founder bottleneck.

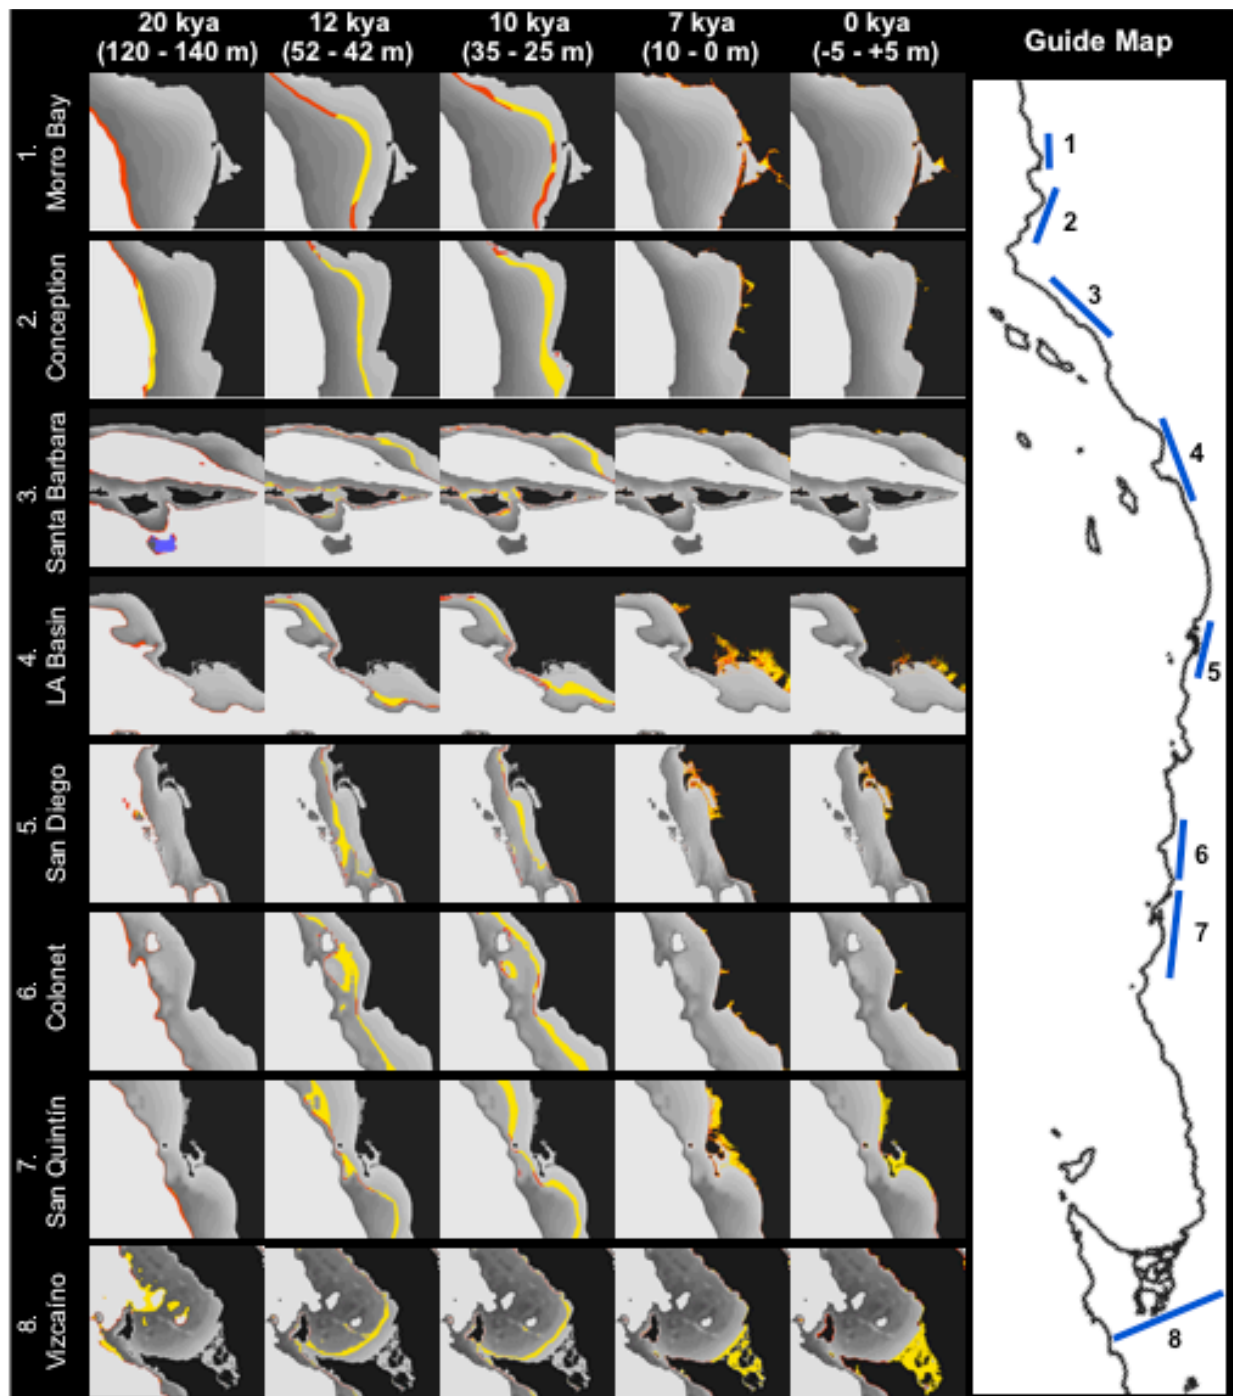

181  
 182  
 183  
 184  
 185  
 186  
 187  
 188  
 189

**Figure S7. Time-series habitat maps.** Locations of inhabitable (yellow) and uninhabitable (red) area for regions (rows) along the coast (see guide map) for specific time points (columns). Time points and depth as meters below present sea level are listed for each column with 0 kya extending to 5 meters above present sea level (+5). Purple denotes areas that meet slope but not the minimum upland drainage area requirement to form estuarine habitat. Coastal regions are not of equal size.

| Age (kya)             | 19.5      | 18.5      | 17        | 15        | 14       | 13.5    | 13      | 11.5    | 11      | 10      | 9.5     | 8.5     | 7.5     | 6.5    | 0       |
|-----------------------|-----------|-----------|-----------|-----------|----------|---------|---------|---------|---------|---------|---------|---------|---------|--------|---------|
| mbpsl                 | 140 - 130 | 130 - 120 | 120 - 110 | 110 - 100 | 100 - 90 | 90 - 80 | 80 - 70 | 70 - 60 | 60 - 50 | 50 - 40 | 40 - 30 | 30 - 20 | 20 - 10 | 10 - 0 | 0 +/- 5 |
| Morro Bay             | 0         | 0         | 5         | 14        | 22       | 24      | 21      | 17      | 20      | 13      | 15      | 14      | 21      | 14     | 10      |
| Conception Refuge     | 25        | 31        | 13        | 12        | 28       | 12      | 38      | 6       | 66      | 63      | 62      | 83      | 36      | 14     | 7       |
| Santa Barbara Channel | 0         | 0         | 10        | 25        | 59       | 79      | 101     | 141     | 101     | 113     | 131     | 183     | 134     | 39     | 46      |
| LA Basin              | 0         | 1         | 3         | 2         | 3        | 9       | 43      | 31      | 75      | 87      | 97      | 162     | 142     | 46     | 68      |
| San Diego             | 3         | 2         | 6         | 12        | 38       | 70      | 54      | 59      | 95      | 95      | 131     | 96      | 154     | 82     | 105     |
| Punta Banda           | 0         | 0         | 24        | 33        | 45       | 36      | 40      | 44      | 41      | 37      | 68      | 143     | 68      | 82     | 45      |
| Colonet               | 7         | 6         | 27        | 29        | 41       | 131     | 204     | 95      | 124     | 86      | 66      | 59      | 41      | 43     | 48      |
| San Quintín           | 2         | 15        | 50        | 60        | 100      | 85      | 104     | 137     | 44      | 119     | 62      | 105     | 74      | 160    | 179     |
| Vizcaino Refuge       | 519       | 821       | 1028      | 1806      | 2816     | 2803    | 2189    | 1124    | 772     | 827     | 729     | 817     | 739     | 1495   | 1665    |

190  
 191 **Figure S8. Habitat area per depth-time.** Listed are habitat areas (km<sup>2</sup>) for each time-depth bin in each  
 192 coastal regions (left), which are ordered by latitude. Cells are coloured by habitat abundance from low  
 193 (red) to high (blue): 0–5 km<sup>2</sup>, red; 5–15 km<sup>2</sup>, orange; 15–30 km<sup>2</sup>, yellow; 30–60 km<sup>2</sup>, green; 60–150 km<sup>2</sup>,  
 194 teal; >150 km<sup>2</sup>, blue. These values are the total summed polygon area per coastal region that meet slope  
 195 requirements. Coastal regions are not of equal area. They represent areas of contiguous habitat formation  
 196 might occur.

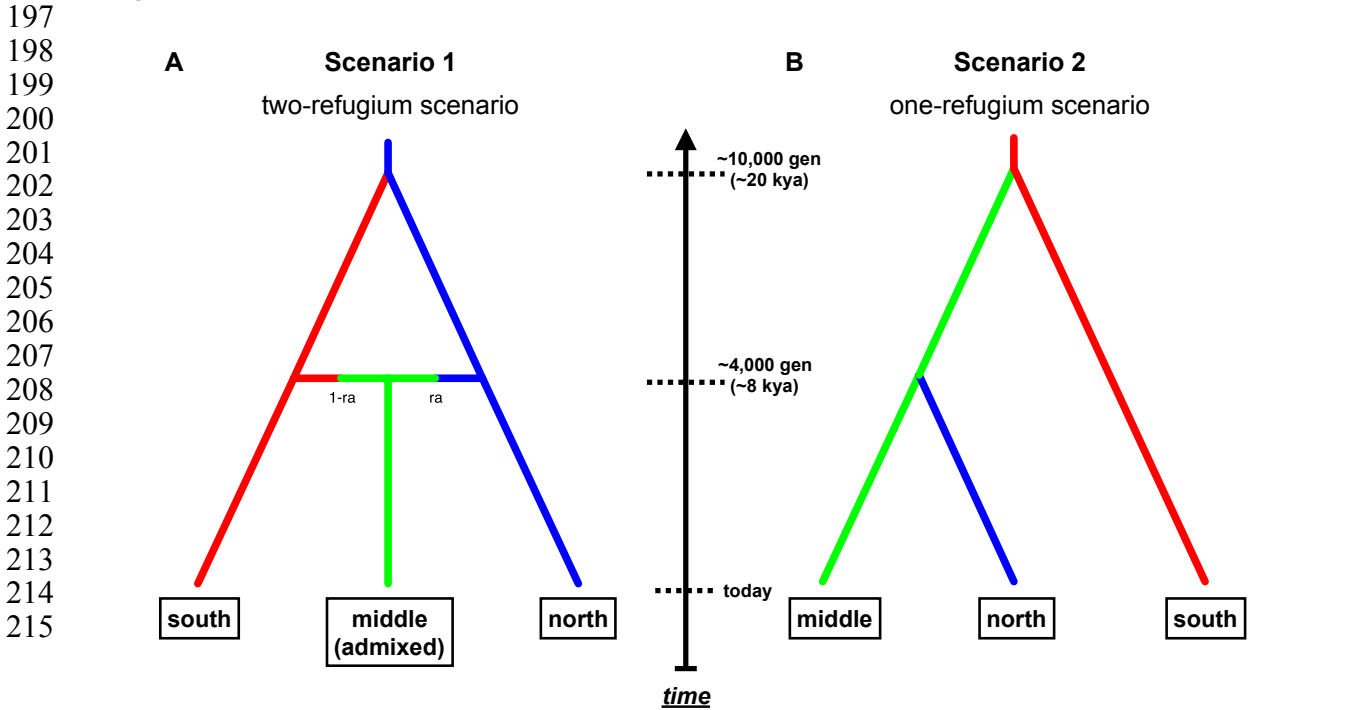

216 **Figure S9. Approximate Bayesian Computation (ABC) scenarios.** These are the models used to test  
 217 statistical support for a two-refugium (Scenario 1) versus one-refugium (Scenario 2) scenario. In Scenario  
 218 1 there are two refugia: north (blue) and south (red), and these admix ~8 kya (4 thousand generations ago)  
 219 to form the middle populations, which are grouped in the middle ‘admixed’ group. Scenario 2 models an  
 220 alternative hypothesis of one-refugium (southern, red) that subsequently colonizes northward to form the  
 221 middle and northern groups. Populations were grouped the same for these scenarios and tested in each of  
 222 the three species.

223 **Table S1. Sample locales.** Sites of collections used in this study (**bold**) and sites only used in Figures S1–  
 224 S3 (not **bold**), corresponding 3-letter codes and coordinates in decimal degrees. Number of individuals  
 225 per site listed; rough linear distance from the northernmost site in this study (Morro Bay) was calculated  
 226 in GOOGLE EARTH using the path tool and following the general orientation of the coastline. These  
 227 geographic distances are used in the regression analysis in Figure 4. Colours correspond to colour coding  
 228 in Figures S1–S3.  
 229

| Site location           | code | latitude° | longitude°  | distance from MOR (km) | SI Fig 1 color | Number of Individuals (N) |                     |                   |
|-------------------------|------|-----------|-------------|------------------------|----------------|---------------------------|---------------------|-------------------|
|                         |      |           |             |                        |                | <i>F. parvipinnis</i>     | <i>G. mirabilis</i> | <i>Q. y-cauda</i> |
| Albany race track       | ALB  | 37.889333 | -122.311683 | -                      | black          | -                         | -                   | -                 |
| <b>Morro Bay</b>        | MOR  | 35.348517 | -120.8336   | 0                      | red            | 12                        | 9                   | 5                 |
| <b>Devereaux Slough</b> | DEV  | 34.41735  | -119.873983 | 176                    | orange         | -                         | 10                  | -                 |
| <b>U. Santa Barbara</b> | USB  | 34.409383 | -119.845017 | 179                    | orange         | -                         | 10                  | -                 |
| <b>Goleta Slough</b>    | GOL  | 34.417046 | -119.839374 | 181                    | orange         | -                         | -                   | 7                 |
| <b>Carpenteria</b>      | CAR  | 34.400167 | -119.538667 | 211                    | orange         | 14                        | -                   | -                 |
| <b>Mandalay Canal</b>   | MDC  | 34.136892 | -119.183952 | 256                    | yellow         | -                         | -                   | 2                 |
| <b>Point Mugu</b>       | MGU  | 34.11391  | -119.0821   | 269                    | yellow         | -                         | 3                   | -                 |
| <b>Ballona Lagoon</b>   | BNA  | 33.962764 | -118.4458   | 334                    | yellow         | -                         | 10                  | -                 |
| <b>Alamitos Bay</b>     | ALA  | 33.745519 | -118.117547 | 391                    | yellow         | 6                         | -                   | 5                 |
| <b>Anaheim Bay</b>      | ANB  | 33.736302 | -118.093844 | 394                    | green          | 5                         | -                   | -                 |
| <b>Catalina Island</b>  | CAT  | 33.430928 | -118.50608  | 448                    | green          | -                         | -                   | 1                 |
| <b>Hidden Lagoon</b>    | HID  | 33.275532 | -117.451668 | 474                    | green          | -                         | 10                  | -                 |
| <b>Santa Margarita</b>  | MRG  | 33.234    | -117.410833 | 480                    | green          | -                         | -                   | 5                 |
| <b>Penasquitos</b>      | PSQ  | 32.9325   | -117.258    | 517                    | green          | 6                         | -                   | 4                 |
| <b>Mission Bay</b>      | MSN  | 32.770833 | -117.232333 | 538                    | cyan           | -                         | -                   | 1                 |
| <b>Famosa Slough</b>    | FAM  | 32.751155 | -117.228381 | 539                    | cyan           | -                         | 12                  | -                 |
| <b>Punta Banda</b>      | BAN  | 31.765157 | -116.617381 | 678                    | cyan           | 12                        | 10                  | -                 |
| <b>San Quintín</b>      | QTN  | 30.418794 | -116.023086 | 872                    | cyan           | 6                         | 12                  | 8                 |
| <b>Laguna Manuela</b>   | MAN  | 28.247533 | -114.085517 | 1266                   | blue           | 6                         | 4                   | 4                 |
| <b>Guerrero Negro</b>   | GNG  | 28.021722 | -114.114667 | 1290                   | blue           | 6                         | 10                  | 2                 |
| <b>Ojo de Liebre</b>    | OJO  | 27.78305  | -114.3129   | 1323                   | blue           | 6                         | -                   | -                 |
| la Bocana               | BOC  | 26.789283 | -113.675733 | -                      | black          | -                         | -                   | -                 |
| Ignacio lagoon          | IGN  | 26.818667 | -113.1815   | -                      | black          | -                         | -                   | -                 |
| el Cuarente             | CUA  | 26.556133 | -113.0028   | -                      | black          | -                         | -                   | -                 |
| Batequi                 | BAT  | 26.42715  | -112.776733 | -                      | black          | -                         | -                   | -                 |
| Purísima                | PUR  | 26.06265  | -112.282083 | -                      | black          | -                         | -                   | -                 |
| el Rosario              | ROS  | 25.698083 | -112.074717 | -                      | black          | -                         | -                   | -                 |
| el Tambor               | TAM  | 24.831932 | -112.055708 | -                      | black          | -                         | -                   | -                 |
| Punta Pajaro            | PPJ  | 24.753467 | -112.043317 | -                      | black          | -                         | -                   | -                 |
| Salinas                 | SAL  | 24.582114 | -111.787706 | -                      | black          | -                         | -                   | -                 |
| Gallinitas              | GAL  | 24.557442 | -111.735303 | -                      | black          | -                         | -                   | -                 |

230  
 231  
 232  
 233  
 234  
 235  
 236  
 237  
 238  
 239

240  
241  
242  
243

**Table S2. Microsatellite primers.** Listed are primers developed for this project. *Gillichthys mirabilis* primers unlisted here are available in [1]. All forward primers in this study were labelled at the 5' end with the M13 complement: 5 'AGGGTTTTCCAGTCACGACGTT '3

| Species               | Marker       | Forward (5' - 3')         | Reverse (5' - 3')      |
|-----------------------|--------------|---------------------------|------------------------|
| <i>F. parvipinnis</i> | <b>FMA02</b> | ATTTACGGCAACCACCTGC       | AACCCTAGCTAACGCCTCC    |
| <i>F. parvipinnis</i> | <b>FMA03</b> | TCCTGACCATCATAACAGATTTCCG | CCTACCTGGCCAACAGC      |
| <i>F. parvipinnis</i> | <b>FMA04</b> | GGAGGTAAACAGGGCACAG       | CAGCATCCAGCAGCTTTCC    |
| <i>F. parvipinnis</i> | <b>FMA05</b> | TCGAGTTGATCCAACAGATTGC    | AGAGGCGGAAACATCCCTG    |
| <i>F. parvipinnis</i> | <b>FMA07</b> | TCCAGTCTGAGCAAACCTCC      | ACGCAGGACACAGTTAGCC    |
| <i>F. parvipinnis</i> | <b>FMA08</b> | GCCAACGTCAAGTCTCAAG       | CTCGCCCATTGTATGCTGG    |
| <i>F. parvipinnis</i> | <b>FMA09</b> | GAAGCAGGAATGGGTAGCG       | AGTCAGTCCCAAACAGTCG    |
| <i>F. parvipinnis</i> | <b>FMA10</b> | CACGCCTTTAACACGTCGG       | CCTGGGAACGCCTTGGG      |
| <i>F. parvipinnis</i> | <b>FMA13</b> | AACCCTGACCTGTATCGGC       | CTGGCCTTTATCATGCTTTCC  |
| <i>F. parvipinnis</i> | <b>FMA14</b> | TCATGCAAAGGTTAGTGTCCG     | GAGGAGCTGGCCCAAGTAG    |
| <i>F. parvipinnis</i> | <b>FMA15</b> | GCCTTGACATAGAGCGTGG       | GTGATCTTGTGTGTACGGC    |
| <i>F. parvipinnis</i> | <b>FMA16</b> | CCAGGAGAGACCATGGGAC       | TTGACAGCTGGAGACAGGC    |
| <i>F. parvipinnis</i> | <b>FMA18</b> | GTTCCCTGCAAGAACAGACG      | CTCCAAGAGAATGTCCGGC    |
| <i>F. parvipinnis</i> | <b>FMA19</b> | CGCTCCAGACAGCTAATGC       | ATTCACGGTGCTACGGAGG    |
| <i>F. parvipinnis</i> | <b>FMA21</b> | CCCCTCAACATACCAAGCTG      | TCCATGCCAGTCATAGGCG    |
| <i>F. parvipinnis</i> | <b>FMA23</b> | TCCTCCCCTTTTATTCCG        | GACTGCAGCCCAGATGTTG    |
| <i>F. parvipinnis</i> | <b>FMA24</b> | CTCCAGCCACACTTTATGCG      | CGGTGAATGTGCTCCAAGG    |
| <i>F. parvipinnis</i> | <b>FMA25</b> | CAGAGCATCACAGAACCTCG      | GTGGACTCTGATTTGCTGCC   |
| <i>F. parvipinnis</i> | <b>FMA26</b> | CAGCCGCCAAATTAGAAAGC      | TCCCATGCTGCAACTTGTT    |
| <i>F. parvipinnis</i> | <b>FMA29</b> | GCTACACTACCCACCTCTGG      | GCATGCAGGCGCTCAACAAG   |
| <i>G. mirabilis</i>   | <b>GMA01</b> | GATTCCGATTCCAATGTTT       | TTGCAACTTACAAGAAATTCAC |
| <i>G. mirabilis</i>   | <b>GMA03</b> | TTGAAGACGTACAGCACCAC      | CCAGTCAGAATGTGTTCCAC   |
| <i>G. mirabilis</i>   | <b>GMA08</b> | TAATGACGCAGTGTGTTGATG     | CTGTGTGCCTTGAAGGTG     |
| <i>G. mirabilis</i>   | <b>GMA14</b> | CATGAATTTAGCACCATCATC     | TTCTTGTGGAGTCTCTTCAAAG |
| <i>G. mirabilis</i>   | <b>GMA20</b> | GACTCTTTGTCCAGCATTTC      | TGTTATTCAAGTGCCATCATC  |
| <i>Q. y-cauda</i>     | <b>QMA01</b> | CTGTGACTTTGGGCATTAG       | AATGCCCTGGTTATCTGTC    |
| <i>Q. y-cauda</i>     | <b>QMA03</b> | CGACATTCACGACACAAATC      | ACGAATTTGACCTGAGAGC    |
| <i>Q. y-cauda</i>     | <b>QMA04</b> | AATGAAACGGTGAAAGAAAC      | TTCAGCTCCTTCAGTTTGAC   |
| <i>Q. y-cauda</i>     | <b>QMA05</b> | TTCTTTCTTGCTTGTCC         | CATGAAGGCACGAAAGAG     |
| <i>Q. y-cauda</i>     | <b>QMA06</b> | GACTGTTCCATGTTCTGTG       | TCAGAGCAGTTAATCCAAAG   |
| <i>Q. y-cauda</i>     | <b>QMA07</b> | CTTCTCCACTCTCTCACAG       | AGCGACGTACTTCTGAAGAG   |
| <i>Q. y-cauda</i>     | <b>QMA08</b> | ACTGAAGCTCCAAGGACAC       | TGATTGTGCTGTGACTCATG   |
| <i>Q. y-cauda</i>     | <b>QMA09</b> | AGTGCAGGCATACATCATG       | TTGATTTGATGTATGCACTG   |
| <i>Q. y-cauda</i>     | <b>QMA10</b> | GTGATTTATGCGTCCAGATG      | TTCAGGGTTCGCTTTAAATC   |
| <i>Q. y-cauda</i>     | <b>QMA13</b> | AGGCTCAGGACTCTCATGTAC     | CTTCTCCTTACCGCTCAG     |
| <i>Q. y-cauda</i>     | <b>QMA17</b> | TATTTGTCATCGCCCTAATG      | CAAATTAAGCCAATTGTTG    |
| <i>Q. y-cauda</i>     | <b>QMA24</b> | CCCCTCCGTCACACTC          | CAATGGTGAGCGCGTACATG   |
| <i>Q. y-cauda</i>     | <b>QMA25</b> | GACATGCTCCTCGTTTGACC      | CACGCCACATTTCAAGGAC    |
| <i>Q. y-cauda</i>     | <b>QMA26</b> | TTCGTCTGACTGTGCTGGTTG     | CTCCTGCTCGGTTTATGCC    |
| <i>Q. y-cauda</i>     | <b>QMA27</b> | GACTGTTCCATGTTCTGTGAG     | ACCTACTTCGACTGACTGGC   |
| <i>Q. y-cauda</i>     | <b>QMA28</b> | ATCTGCAGTAACGTGGGCTC      | AGTGTGCTCGTGACTTATGC   |
| <i>Q. y-cauda</i>     | <b>QMA30</b> | TTGACTGCGCTTTACATGG       | CACGGACTGTTGACAATATTG  |

244  
245  
246  
247

248 **Table S3. Slope measurements.** Sites where at least two of the three species co-occur were measured  
 249 five times, others were measured once. Run lengths vary based on what portion of the estuary was being  
 250 measured and overall size of the system.

| Site                  | Slope (%) | Run Length (km) |
|-----------------------|-----------|-----------------|
| Morro Bay             | 0.499     | 500-600         |
| Morro Bay             | 0.906     | 500-600         |
| Morro Bay             | 1.111     | 500-600         |
| Morro Bay             | 1.150     | 500-600         |
| Morro Bay             | 0.363     | 500-600         |
| Alamitos Bay          | 0.498     | 200-400         |
| Alamitos Bay          | 0.256     | 200-400         |
| Alamitos Bay          | 0.455     | 200-400         |
| Alamitos Bay          | 0.578     | 200-400         |
| Alamitos Bay          | 0.000     | 200-400         |
| Banda                 | 0.000     | 200-600         |
| Banda                 | 0.00      | 200-600         |
| Banda                 | 0.687     | 200-600         |
| Banda                 | 0.192     | 200-600         |
| Banda                 | 0.241     | 200-600         |
| San Quintín           | 0.000     | 1000-1700       |
| San Quintín           | 0.000     | 1000-1700       |
| San Quintín           | 0.312     | 1000-1700       |
| San Quintín           | 0.100     | 1000-1700       |
| San Quintín           | 0.198     | 1000-1700       |
| Vizcaíno              | 0.106     | 2000-5000       |
| Vizcaíno              | 0.116     | 2000-5000       |
| Vizcaíno              | 0.254     | 2000-5000       |
| Vizcaíno              | 0.743     | 2000-5000       |
| Vizcaíno              | 1.263     | 2000-5000       |
| Devereaux Slough      | 0.424     | 250             |
| Santa Barbara Channel | 0.713     | 400             |
| Carpenteria           | 0.952     | 100             |
| Goleta Slough         | 1.330     | 75              |
| Point Mugu            | 0.542     | 350             |
| Catalina              | 0.298     | 350             |
| Mandalay Canal        | 0.498     | 200             |
| Ballona               | 0.862     | 120             |
| Anaheim Bay           | 0.000     | 500             |
| Los Penasquitos       | 0.571     | 175             |
| Famosa Slough         | 0.437     | 250             |
| Santa Margarita       | 0.305     | 985             |
| Mission Bay           | 0.328     | 305             |

295  
296  
297  
298

299  
 300  
 301  
 302  
 303

**Table S4. Fixation indices.** For *G. mirabilis* (A), *Q. y-cauda* (B), and *F. parvipinnis* (C) pairwise Fst values listed on the lower half of the table and significance indicated (p value < 0.01) on the upper half. Note that populations may be sample-limited for this metric, particularly in *Q. y-cauda*.

| <b>A</b> | MOR     | DEV      | USB      | MGU      | BNA      | FAM      | HID      | BAN      | QTN     | MAN      | GNG |
|----------|---------|----------|----------|----------|----------|----------|----------|----------|---------|----------|-----|
| MOR      |         | -        | +        | -        | +        | +        | +        | +        | +       | +        | +   |
| DEV      | 0.11259 |          | -        | -        | -        | -        | +        | -        | +       | -        | +   |
| USB      | 0.1585  | -0.00284 |          | -        | -        | +        | +        | +        | +       | -        | +   |
| MGU      | 0.02382 | -0.02909 | -0.00054 |          | -        | -        | +        | -        | +       | -        | -   |
| BNA      | 0.14001 | 0.04147  | 0.04251  | -0.01184 |          | +        | +        | -        | +       | -        | +   |
| FAM      | 0.15165 | 0.04154  | 0.086    | 0.03708  | 0.061    |          | +        | +        | +       | +        | +   |
| HID      | 0.36703 | 0.28492  | 0.37074  | 0.26191  | 0.30592  | 0.23939  |          | +        | +       | +        | +   |
| BAN      | 0.11088 | 0.04977  | 0.07244  | 0.02616  | 0.05321  | 0.05381  | 0.35553  |          | +       | -        | +   |
| QTN      | 0.23894 | 0.16832  | 0.14758  | 0.15631  | 0.19337  | 0.15255  | 0.42318  | 0.08467  |         | -        | +   |
| MAN      | 0.17583 | 0.06185  | 0.07306  | 0.02963  | 0.11049  | 0.11616  | 0.42224  | -0.00465 | 0.04351 |          | -   |
| GNG      | 0.16641 | 0.11276  | 0.13273  | 0.08537  | 0.15241  | 0.09274  | 0.2881   | 0.05073  | 0.06413 | -0.00933 |     |
| <b>B</b> | MOR     | GOL      | CAT      | MDC      | ALA      | MRG      | PSQ      | MSN      | QTN     | MAN      | GNG |
| MOR      |         | +        | -        | -        | +        | +        | -        | -        | +       | +        | -   |
| GOL      | 0.18882 |          | -        | -        | -        | +        | -        | -        | +       | +        | -   |
| CAT      | 0.35014 | 0.35305  |          | -        | -        | -        | -        | -        | -       | -        | -   |
| MDC      | 0.02749 | 0.0252   | 0.22865  |          | -        | -        | -        | -        | -       | -        | -   |
| ALA      | 0.14909 | 0.06344  | 0.21702  | 0.02549  |          | -        | -        | -        | -       | -        | -   |
| MRG      | 0.2212  | 0.12796  | 0.22574  | 0.08269  | 0.01366  |          | -        | -        | -       | -        | -   |
| PSQ      | 0.16498 | 0.08628  | 0.20494  | 0.03161  | -0.00175 | -0.02079 |          | -        | -       | -        | -   |
| MSN      | 0.07978 | 0.0898   | 0.45455  | -0.03927 | 0.00809  | 0.04493  | 0.02279  |          | -       | -        | -   |
| QTN      | 0.21292 | 0.13986  | 0.25464  | 0.10784  | 0.056    | 0.04772  | -0.01143 | 0.03424  |         | -        | -   |
| MAN      | 0.23235 | 0.21966  | 0.25788  | 0.12299  | 0.08238  | 0.09591  | 0.0878   | 0.03725  | 0.08041 |          | -   |
| GNG      | 0.30393 | 0.21731  | 0.32613  | 0.14373  | 0.10027  | 0.02961  | -0.01873 | -0.00267 | 0.00494 | 0.0298   |     |
| <b>C</b> | MOR     | CAR      | ALA      | ANB      | PSQ      | BAN      | QTN      | MAN      | GNG     | OJO      |     |
| MOR      |         | +        | +        | +        | +        | +        | +        | +        | +       | +        |     |
| CAR      | 0.12178 |          | +        | +        | +        | +        | +        | +        | +       | +        |     |
| ALA      | 0.18952 | 0.1248   |          | -        | +        | +        | +        | +        | +       | +        |     |
| ANB      | 0.14079 | 0.06373  | 0.04448  |          | -        | +        | +        | +        | +       | +        |     |
| PSQ      | 0.18514 | 0.0925   | 0.0784   | 0.03604  |          | +        | +        | +        | +       | +        |     |
| BAN      | 0.20903 | 0.1308   | 0.10186  | 0.11841  | 0.08601  |          | +        | +        | +       | +        |     |
| QTN      | 0.36129 | 0.29639  | 0.23719  | 0.25691  | 0.26707  | 0.111    |          | +        | +       | +        |     |
| MAN      | 0.2809  | 0.19879  | 0.16387  | 0.15858  | 0.17707  | 0.1074   | 0.09602  |          | -       | -        |     |
| GNG      | 0.23274 | 0.16499  | 0.1211   | 0.10075  | 0.12859  | 0.08157  | 0.1129   | 0.01897  |         | -        |     |
| OJO      | 0.26223 | 0.17876  | 0.13097  | 0.13189  | 0.13236  | 0.04938  | 0.07599  | 0.0082   | 0.0167  |          |     |



304 **Table S5. AICc regression values.** Comparison of AICc values for linear, quadratic, and cubic  
 305 regressions of northern and southern allele counts versus geographic distance. Yellow cells indicate the  
 306 favoured regression for each allele set.  
 307

| Taxon                         | AICc regression scores |           |         |
|-------------------------------|------------------------|-----------|---------|
|                               | linear                 | quadratic | cubic   |
| <i>G. mirabilis</i> - North   | 369.045                | 368.924   | 368.88  |
| <i>G. mirabilis</i> - South   | 297.835                | 299.836   | 301.451 |
| <i>Q. y-cauda</i> - North     | 208.753                | 209.045   | 211.482 |
| <i>Q. y-cauda</i> - South     | 177.798                | 179.985   | 181.337 |
| <i>F. parvipinnis</i> - North | 378.669                | 347.987   | 343.632 |
| <i>F. parvipinnis</i> - South | 354.81                 | 354.537   | 335.681 |

308  
 309  
 310  
 311  
 312  
 313  
 314  
 315  
 316  
 317  
 318  
 319  
 320  
 321  
 322  
 323  
 324  
 325  
 326  
 327  
 328  
 329  
 330  
 331  
 332  
 333  
 334  
 335  
 336  
 337  
 338  
 339  
 340  
 341  
 342  
 343  
 344  
 345  
 346  
 347  
 348  
 349  
 350  
 351  
 352  
 353  
 354

355  
 356  
 357  
 358  
 359  
 360  
 361  
 362  
 363  
 364  
 365  
 366  
 367  
 368  
 369  
 370  
 371  
 372  
 373  
 374  
 375  
 376  
 377  
 378  
 379  
 380  
 381  
 382  
 383  
 384  
 385  
 386  
 387  
 388  
 389  
 390  
 391

**Table S6. Refugium model values.** Comparison of p-value and corrected Akaike Information Criterion (AICc) scores for different refugium scenarios (left column). Results are from Generalized Linear Models using the predictive variables identified via DFA (Maximum Polygon Area and Summed Habitat Area). Asterisks denote significant values, daggers denote models performed with Firth’s Biased Adjustment estimates, double daggers denote models run with False Discovery Rate. After corrections, only the Vizcaíno and North Conception refugium model scenario is statistically significant (shown in yellow). A Vizcaíno only refugium is not supported.

| Refugium Model Scenario                         | Habitat |         |
|-------------------------------------------------|---------|---------|
|                                                 | p-value | AICc    |
| Vizcaíno + N. Conception                        | 0.0085* | 18.0000 |
| Vizcaíno + N. Conception†‡                      | 0.0240* | 12.9156 |
| Vizcaíno + Morro Bay                            | 0.0813  | 17.2383 |
| Vizcaíno + Morro Bay + N. Conception            | 0.0599  | 23.8280 |
| Vizcaíno + Morro Bay + N. Conception†‡          | 0.1297  | 25.3831 |
| Vizcaíno + Morro Bay + N. Conception + LA Basin | 0.2165  | 20.1049 |
| Vizcaíno + LA Basin                             | 0.0889  | 15.4952 |
| Vizcaíno + LA Basin†‡                           | 0.2716  | 24.9661 |
| Vizcaíno + Santa Barbara Channel                | 0.0889  | 15.4952 |
| Vizcaíno + Santa Barbara Channel†‡              | 0.2716  | 24.9661 |
| Vizcaíno only                                   | 0.0433* | 10.8000 |
| Vizcaíno only†‡                                 | 0.1147  | 20.0641 |
| San Quintín + N. Conception                     | 0.1786  | 16.8895 |
| Vizcaíno + San Quintín + N. Conception          | 0.0633  | 16.7370 |
| Vizcaíno + San Quintín + N. Conception†‡        | 0.1146  | 25.1359 |

392 **Table S7. Approximate Bayesian Computation (ABC) results.** Posterior scores are shown for a two-  
 393 refugium (scenario 1) and a one-refugium (scenario 2) model using both direct and logistic sampling of  
 394 the posterior. A two-refugium model (scenario 1) is supported in all cases (higher posterior scores for  
 395 each comparison are bolded). An estimation of the error rates (posterior predictive error) shows errors  
 396 ranging from 14 % to 23 %.  
 397

|                                   |                       | <i><b>Glicthys mirabilis</b></i> | <i><b>Quietula y-cauda</b></i> | <i><b>Fundulus parvipinnis</b></i> |
|-----------------------------------|-----------------------|----------------------------------|--------------------------------|------------------------------------|
|                                   |                       | (Scenario 1:2)                   |                                |                                    |
| <b>Posterior (Direct)</b>         | <i>200 closest</i>    | <b>0.60</b> :0.40                | <b>0.60</b> :0.40              | <b>0.71</b> :0.29                  |
|                                   | <i>500 closest</i>    | <b>0.59</b> :0.41                | <b>0.54</b> :0.46              | <b>0.66</b> :0.34                  |
| <b>Posterior (Logistic)</b>       | <i>8,000 closest</i>  | <b>0.97</b> :0.03                | <b>0.73</b> :0.27              | <b>0.98</b> :0.02                  |
|                                   | <i>20,000 closest</i> | <b>0.94</b> :0.06                | <b>0.70</b> :0.30              | <b>0.98</b> :0.02                  |
| <b>Posterior predictive error</b> |                       | computed over 1000 data sets     |                                |                                    |
|                                   | <i>Direct:</i>        | 0.15                             | 0.23                           | 0.16                               |
|                                   | <i>Logistic:</i>      | 0.14                             | 0.22                           | 0.15                               |
